# Supplementary material
Source: PubMed Central journal article supplement (PMC7876868)
Supplement: advancesADV2020002971-suppl1.pdf [file advancesADV2020002971-suppl1.pdf]

## Supplemental Methods

### Materials

DMEM and Opti-MEM cell culture media, HBSS, and Geneticin were purchased from Gibco Life Technologies (Waltham MA). Fetal Bovine serum was purchased from VWR (Radner, PA). Cell culture plates, flasks, and ELISA costar 96-well plates were purchased from Corning (Corning, NY) and conical tubes were purchased from Sarstedt (Nümbrecht, Germany). Restriction enzymes NheI, AgeI, NotI, and BssHIII were purchased from New England Biolabs (Ipswich, MA). Heparin-Sepharose 6 Fast Flow, “VIIISelect” resin, HiTrap SPHP columns, and SFM4HEK293 media was purchased from GE Healthcare (Chicago, IL) and Poly-Prep columns were purchased from Bio-Rad (Hercules, CA). HEK cell lines were purchased from ATCC (Manassas, VA) with the exception of Expi293<sup>TM</sup>F and HEK293-H cells purchased from Thermo Fisher Scientific (Waltham, MA). Polyethylenimine, o-phenylenediamine dihydrochloride, RNAlater, bovine serum albumin, and M2 anti-FLAG antibody were purchased from Sigma-Aldrich (St. Louis, MO). TransIT-EE hydrodynamic buffer and TransIT-X2 transfection reagent were purchased from Mirus Bio (Madison, WI). DNA and RNA purification kits were purchased from Qiagen (Germantown, MD) and Omega Bio-Tek (Norcross, GA). Amicon 50K NMWL filters were purchased from EMD Millipore (Burlington, MA). Immunohistochemistry DAKO protein block, DAKO mounting medium, isotype antibody X0936, polyclonal rabbit anti-human VWF antibodies A0082 and P0226 were purchased from Agilent (Santa Clara, CA). Factor VIII chromogenic SP4 assay was purchased from Diapharma (Chester, OH). WHO standard human plasma, and the INNOVANCE VWF:Ac kit were purchased from Siemens (Munich, Germany). RNase Inhibitor RiboLock, Power SYBR<sup>TM</sup> Green PCR master mix, and Multiscribe<sup>TM</sup> reverse transcriptase were purchased from Thermo Fisher Scientific (Waltham, MA). The ExpiFectamine293<sup>TM</sup> transfection reagents and Expi293<sup>TM</sup> expression media was also purchased from Thermo Fisher Scientific. Human collagen type I was purchased from StemCell Technologies (Vancouver, Canada) and human collagen type III was purchased from Sigma-Aldrich (St. Louis, MO). Maleic anhydride activated plates were purchased from Thermo Scientific (Waltham, MA). Recombinant B-domain deleted human FVIII was provided by Octapharma Biopharmaceuticals GmbH (Berlin, Germany).

### Ancestral FVIII expression and purification

Production clones for An63-, 70-, 84-, and 88-FVIII were generated in HEK293-H cells. Monoclonal populations were isolated under Geneticin selection and expanded as suspension cultures in FreeStyle<sup>TM</sup> 293 media without serum. Adherent populations were cultured in triple flasks in SFM4HEK293 medium. An101-FVIII protein was collected from a polyclonal population of HEK293-H cells transduced with lentivirus encoding the An101-FVIII cDNA. Lentiviral vectors were produced as previously described<sup>1</sup>. All ancestral FVIII was purified initially with the ‘VIIISelect’ resin according to the manufacturer’s instructions and followed by a 5-mL SPHP cation exchange HiTrap column. FVIII was eluted with a NaCl gradient as previously described<sup>2</sup>.

### Collagen Binding

Collagen binding assays were performed as previously reported<sup>3,4</sup> using human collagen type I and III. Briefly, maleic anhydride activated plates were coated with 10 µg/mL human collagen (95% type I, 5% type III) for 2 hours at room temperature. Plate was washed three times with 75 mM NaCl, 5 mM Tris, 0.1% Tween-20, pH 9.1 and blocked overnight in phosphate buffered saline with 5% BSA. Recombinant AnVWF protein curves were diluted in PBS with 1% BSA, 0.1% Tween-20 and applied to the collagen coated plates. VWF was detected with DAKO anti-human VWF polyclonal antibody P0226 at a dilution of 1:1000 in diluent. Absorbance of HRP mediated catalysis of OPD was conducted at 492 nm. Ancestral VWF curves were compared to human recombinant VWF and reference human plasma was also included.

#### Kinetic SPR Measurements

Kinetic SPR SCK was run with five sequential 60 s injections with increasing concentrations of each FVIII-variant (0.185 – 15 nM) followed by a final 300 second dissociation phase. The sensorgrams were fitted globally by using a 1:1 binding model and setting RI = 0. Goodness of the fits were evaluated by visual inspection of the fit, the residual plot, T values,  $\chi^2$  value and U-value. Because a clear differentiation only by means of T values,  $\chi^2$  value and U-value was insufficient we introduced a classification for the fit quality with a visual inspection of the fit and the residual plot (1  $\triangleq$  good fit, residuals within 3x SE and minor systemic deviations; 2  $\triangleq$  weak fit mainly in the last injections, residuals within 3x SE and clear systemic deviations; 3  $\triangleq$  bad fit overall, residuals higher than 3x SE and clear systemic deviations).

## Supplemental Tables

Supplemental Table 1. Kinetic SPR Affinity determinations with 1:1 binding model (nM)

| $K_D$ (nM)  | coh-VWF            | An101-VWF          | An84-VWF           | An63-VWF           | An70-VWF           | An88-VWF           |
|-------------|--------------------|--------------------|--------------------|--------------------|--------------------|--------------------|
| hFVIII      | 0.48 ( $\pm$ 0.06) | 0.45 ( $\pm$ 0.02) | 1.4 ( $\pm$ 0.53)  | 0.88 ( $\pm$ 0.24) | 0.27 ( $\pm$ 0.03) | 0.42 ( $\pm$ 0.08) |
| An101-FVIII | 0.49 ( $\pm$ 0.08) | 0.49 ( $\pm$ 0.03) | 1.2 ( $\pm$ 0.36)  | 0.83 ( $\pm$ 0.19) | 0.30 ( $\pm$ 0.02) | 0.44 ( $\pm$ 0.07) |
| An84-FVIII  | 0.59 ( $\pm$ 0.07) | 0.56 ( $\pm$ 0.07) | 1.1 ( $\pm$ 0.22)  | 0.60 ( $\pm$ 0.1)  | 0.38 ( $\pm$ 0.01) | 0.53 ( $\pm$ 0.07) |
| An63-FVIII  | 0.63 ( $\pm$ 0.07) | 0.57 ( $\pm$ 0.08) | 1.5 ( $\pm$ 0.29)  | 0.88 ( $\pm$ 0.21) | 0.35 ( $\pm$ 0.03) | 0.64 ( $\pm$ 0.06) |
| An70-FVIII  | 0.72 ( $\pm$ 0.06) | 0.52 ( $\pm$ 0.1)  | 2.1 ( $\pm$ 0.58)  | 0.85 ( $\pm$ 0.14) | 0.41 ( $\pm$ 0.03) | 0.66 ( $\pm$ 0.05) |
| An88-FVIII  | 0.37 ( $\pm$ 0.07) | 0.54 ( $\pm$ 0.11) | 0.65 ( $\pm$ 0.12) | 0.57 ( $\pm$ 0.03) | 0.85 ( $\pm$ 0.09) | 0.61 ( $\pm$ 0.03) |
|             | n=6                | n=3                | n=4                | n=4                | n=3                | n=3                |

|  |                                           |
|--|-------------------------------------------|
|  | Classification of fit quality 1; good fit |
|  | Classification of fit quality 2; weak fit |
|  | Classification of fit quality 3; bad fit  |

Supplemental Table 2. *P*-values of steady state affinity determinations (Dunnett's ANOVA)

|                    | coh-VWF | An101-VWF | An84-VWF | An63-VWF | An70-VWF | An88-VWF |
|--------------------|---------|-----------|----------|----------|----------|----------|
| <b>hFVIII</b>      |         | 0.5871    | < 0.0001 | < 0.0001 | 0.0013   | 0.1707   |
| <b>An101-FVIII</b> | 0.9991  | 0.9988    | < 0.0001 | < 0.0001 | 0.0154   | 0.1602   |
| <b>An84-FVIII</b>  | 0.993   | 0.9999    | 0.1502   | 0.0047   | 0.112    | 0.0647   |
| <b>An63-FVIII</b>  | 0.9855  | 0.0883    | < 0.0001 | < 0.0001 | 0.0331   | 0.9994   |
| <b>An70-FVIII</b>  | 0.9787  | 0.0539    | < 0.0001 | < 0.0001 | 0.0422   | > 0.9999 |
| <b>An88-FVIII</b>  | 0.0354  | 0.0575    | 0.3199   | 0.2186   | 0.4592   | 0.0045   |

# Supplemental Figures

## S.Figure 1A

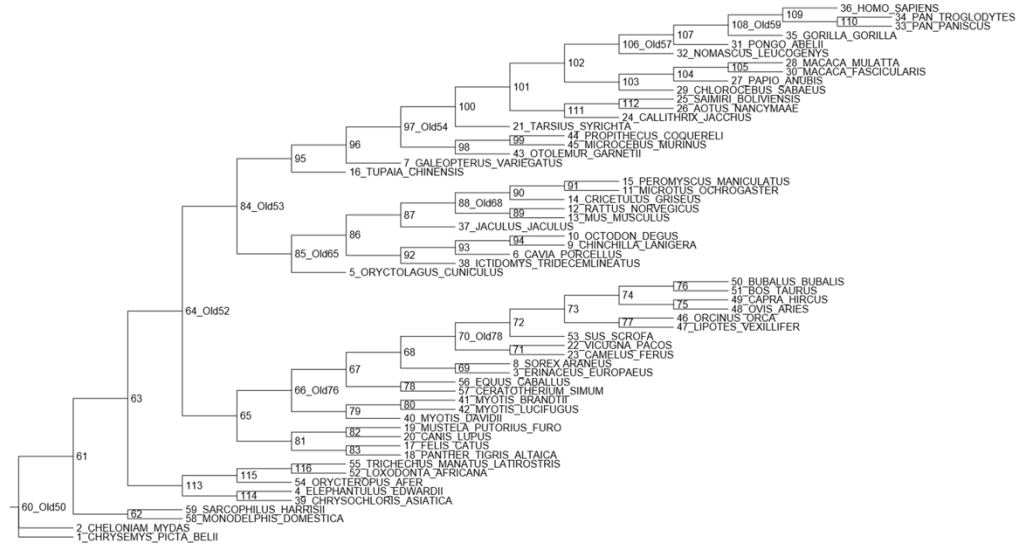

## S.Figure 1B

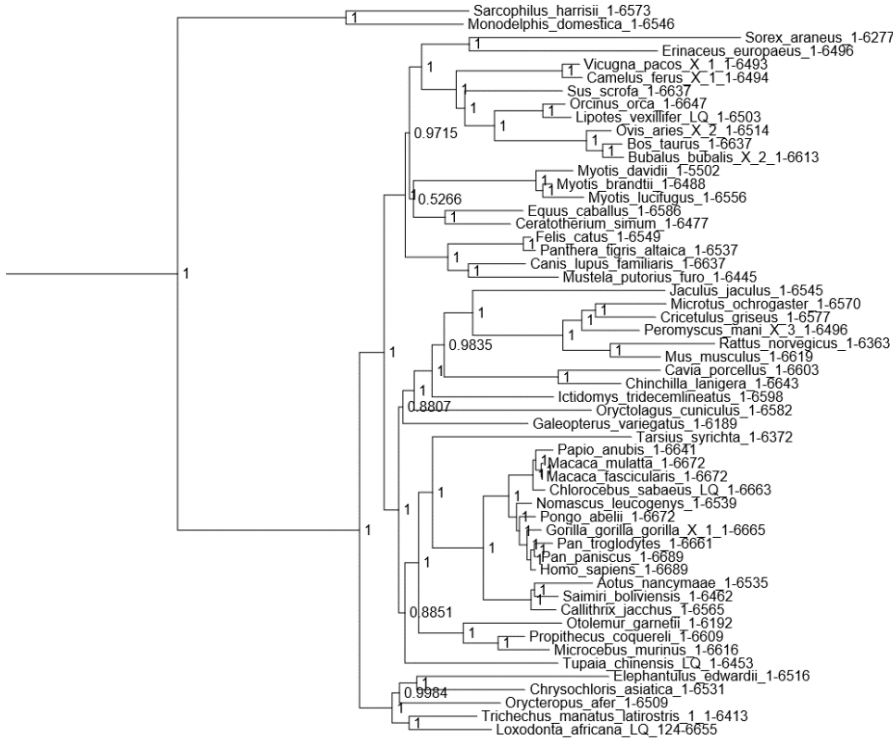

Supplemental Figure 1. **a**, Representative cladogram and species distribution for VWF as well as coagulation factors V, VII, VIII, IX, and X. Node numbers correspond to the identities of extant (1-59) or ancestral sequences (60-112). **b**, Representative phylogram for VWF as well as coagulation factors V, VII, VIII, IX, and X. Scale bar represents amino acid replacements per site per unit evolutionary time. Numbers next to nodes represent the Bayesian support for that particular node.

S. Figure 2A

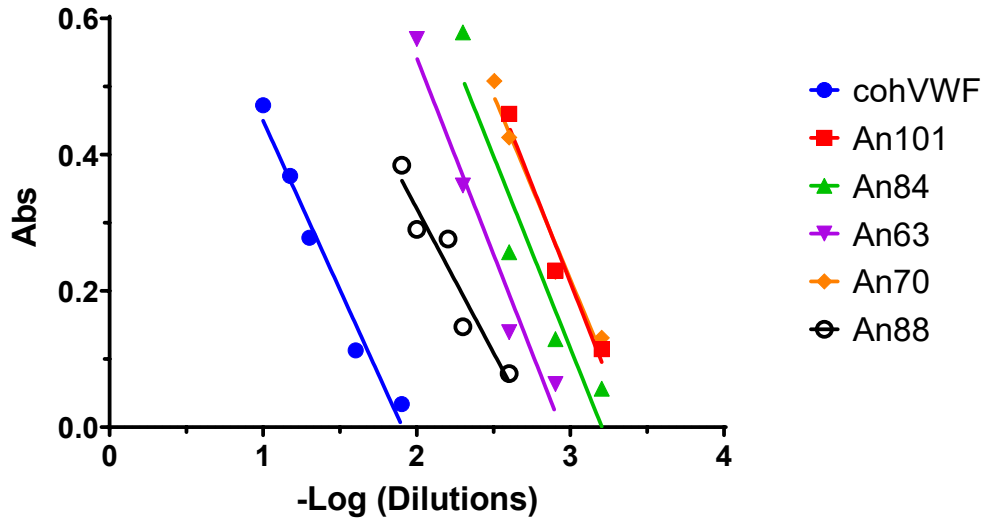

S. Figure 2B

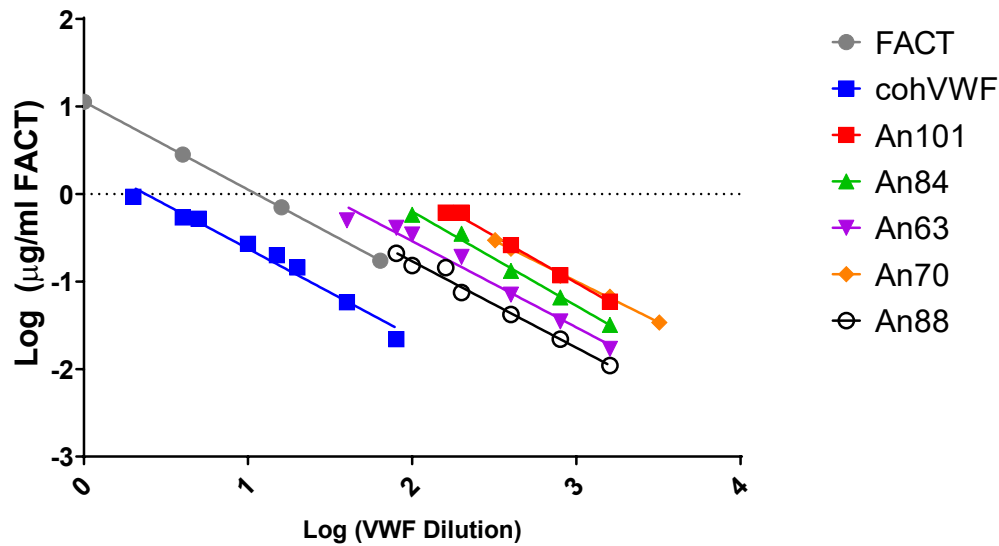

Supplemental Figure 2. Quantification of ancestral VWF:Ag was performed by ELISA using polyclonal antibodies across a range of dilutions to identify maximum and minimum detection limits, **a**. Antibody concentrations were maintained in excess and parallel OD values were observed. Using pooled normal human plasma (FACT), concentrations of VWF antigen at each dilution were elucidated, **b**.

S. Figure 3A

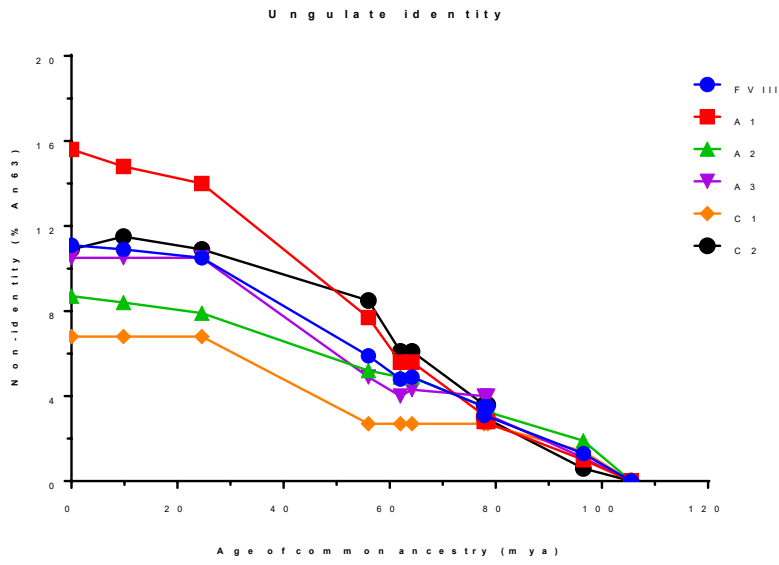

S. Figure 3B

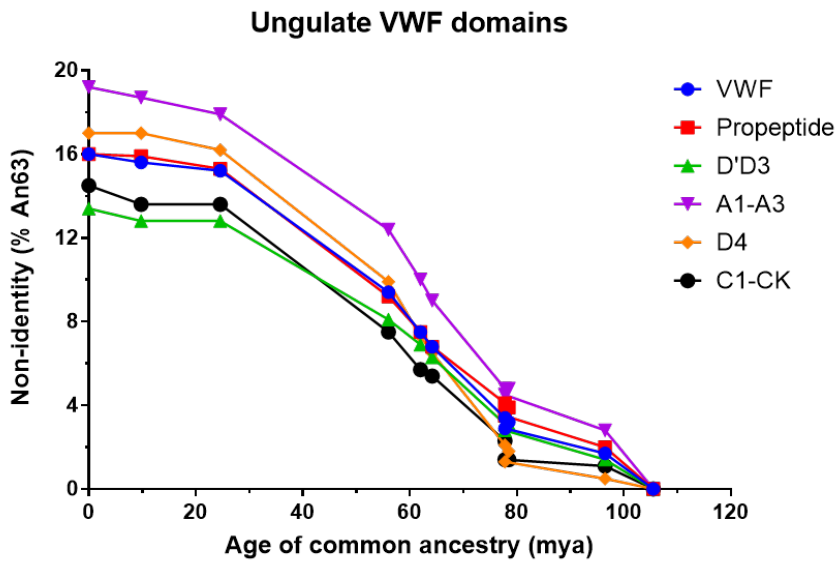

S. Figure 3C

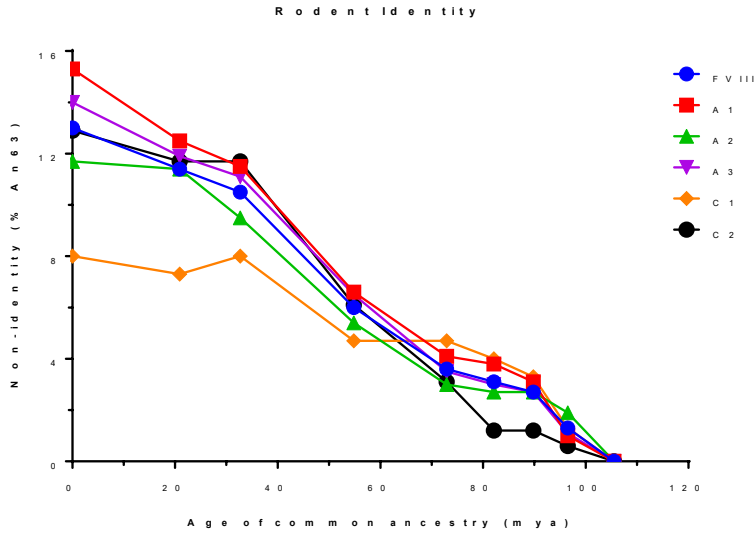

S. Figure 3D

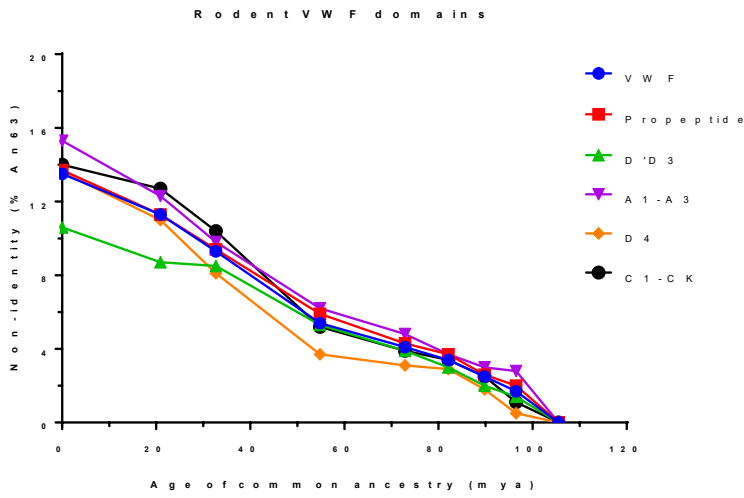

Supplemental Figure 3. Total accumulation of mutations within specific subdomains of FVIII **a**, **c** or VWF **b**, **d** are shown as percent non-identity relative to the size of each domain across ungulate **a**, **b** and rodent, **c**, **d**, lineages. The common ancestor An-63 VWF and FVIII sequences serve as the reference.



S. Figure 4

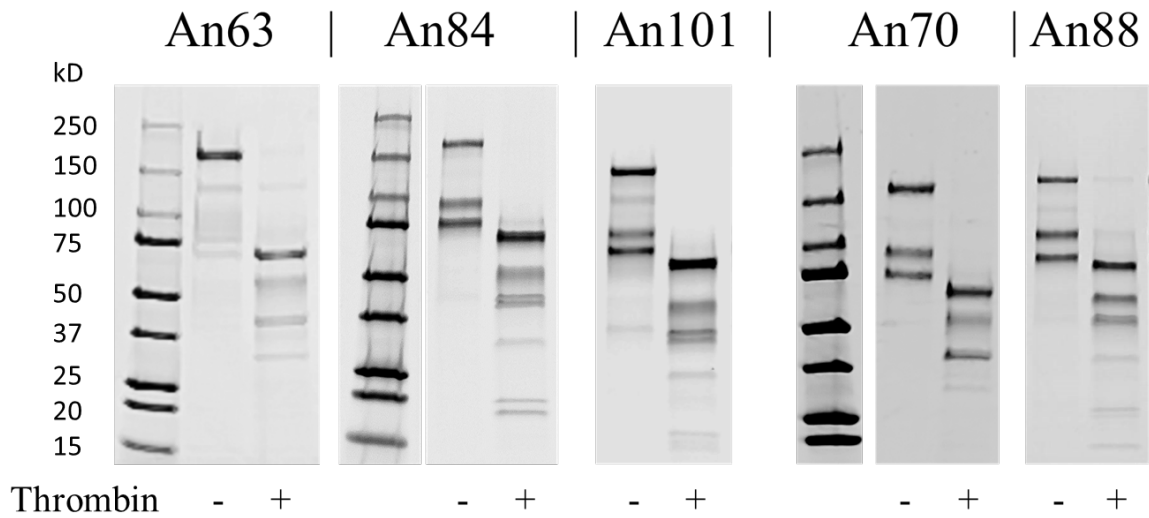

Supplemental Figure 4. AnFVIII protein was purified using affinity and ion exchange chromatography and analyzed via SDS-PAGE and Coomassie stain before and after thrombin activation. Specific activities for An63, An84, An101, An70, and An88 are 20522, 15964, 7809, 19918, and 4233 U/mg, respectively. Specific activities were determined by one-stage coagulation and normalized to absorbance after extinction coefficient correction.

S. Figure 5

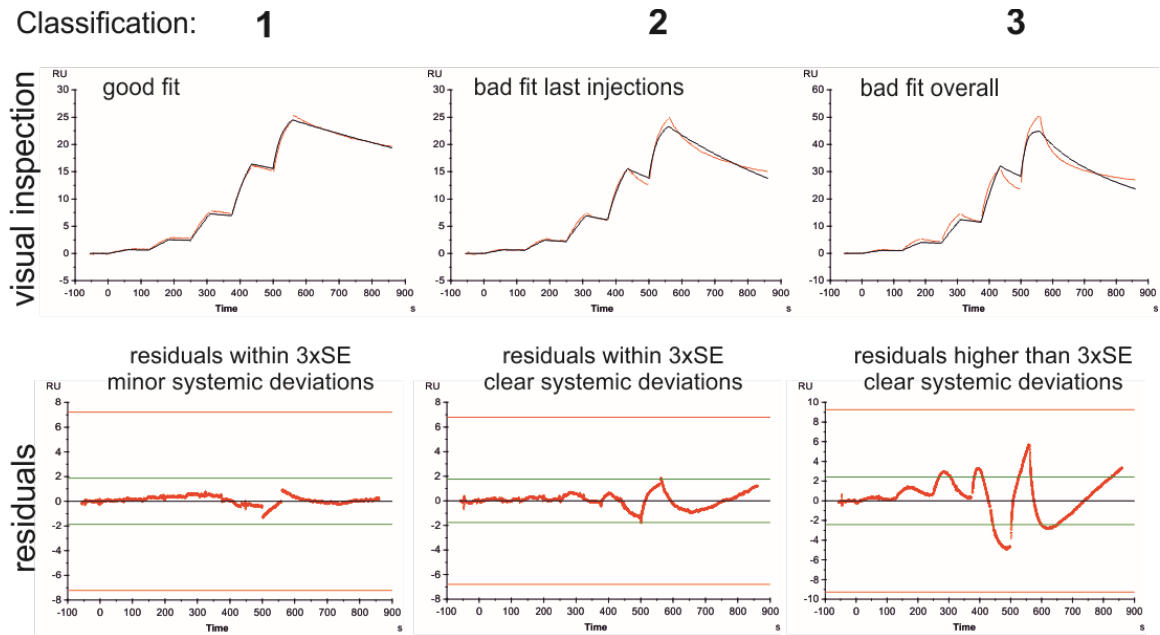

Supplemental Figure 5. Classification for inspection of 1:1 Binding fits to SPR sensorgrams. Each single sensorgram was fitted globally and  $RI=0$  with the 1:1 Binding model with the BiaEvaluation software. The fits were separately evaluated according to the parameters shown in the figure and a classification for the visual inspection of the fit and the residual plot was assigned.

S. Figure 6

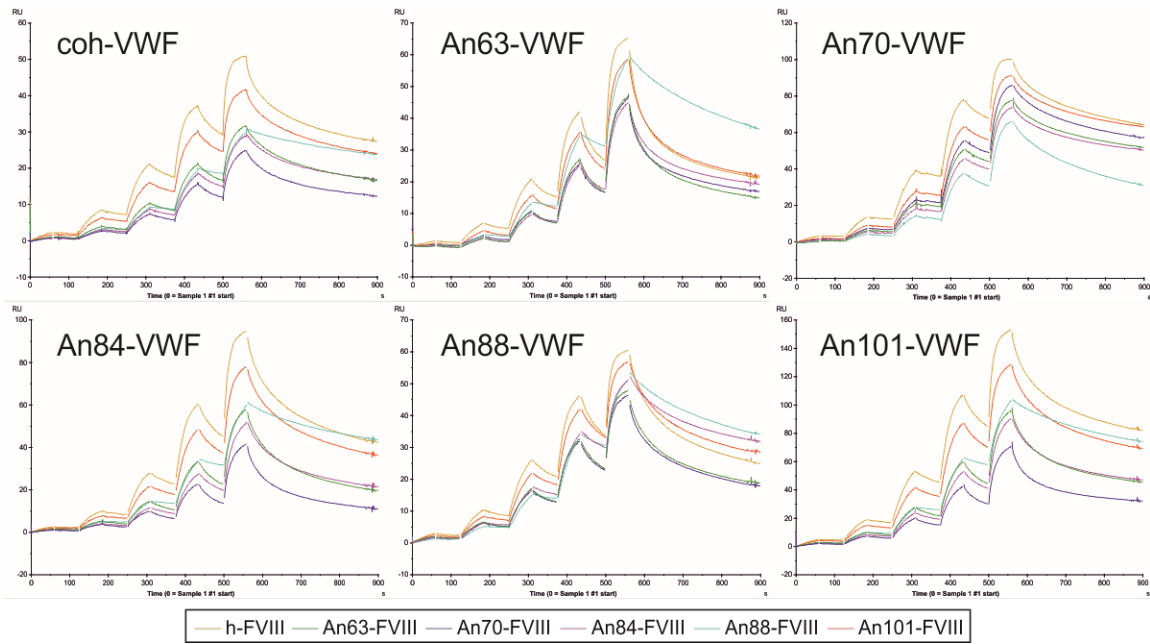

Supplemental Figure 6. 88-FVIII has a lower dissociation rate. Exemplary comparison of double reference subtracted sensorgrams on different VWF molecules. 88-FVIII shows a slower dissociation suggesting a different type of binding mode compared to the other FVIII variants.

S. Figure 7

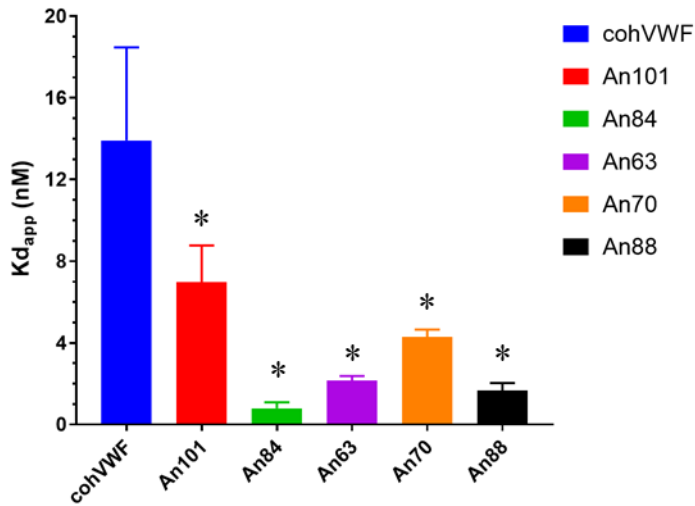

Supplemental Figure 7. Human collagen type I (95%) and type III (5%) at 10  $\mu\text{g}/\text{ml}$  was coated to maleic anhydride activated plates. Dilutions of recombinant VWF were captured and detected using polyclonal antibodies. Shown are the mean  $\pm$  SD  $K_{d_{app}}$  values of three independent experiments.  $K_{d_{app}}$  values for cohVWF, An101, An84, An63, An70, and An88 are 13.9, 7.0, 0.79, 2.2, 4.3, and 1.7 nM, respectively ( $P < 0.005$  for all ancestral VWF, One-way ANOVA, Dunnetts).

## Amino Acid Sequences:

Human VWF:

MIPARFAGVLLALALILPGTLCAEGTRGRSSTARCSLFGSDFVNTFDGSMYSFAGYCSYL  
LAGGCQKRSFSIIGDFQNGKRVSLSVYLGEFFDIHLFVNGTQGDQRVSMFYASKGLY  
LETEAGYYKLSGEAYGFVARIDGSGNFQVLLSDRYFNKTCGLCGNFNIFAEDDFMTQEG  
TLTSDPYDFANSWALSSGEQWCERASPPSSSCNISSGEMQKGLWEQCQLLKSTSVFARC  
HPLVDPEPFVALCEKTLCECAGGLECACPALLEYARTCAQEGMVLYGWTDHSAACSPVC  
PAGMEYRQCVSPCARTCQSLHINEMCQERCVDGCSCPEGQLLDEGLCVESTECPCVHSG  
KRYPPGTSLSRDCNTCICRNSQWICSNEECPGECLVTGQSHFKSFDNRYFTFSGICQYLLA  
RDCQDHSFSIVIETVQCADDRDAVCTRSVTVRLPGLHNSLVKLVKHGAGVAMDGQDVQL  
PLLKGDRLRIQHTVTASVRLSYGEDLQMDWDGRGRLLVKLSVPVYAGKTCGLCGNYNGN  
QGDDFLTPSGLAEPVEDFGNAWKLHGDCQDLQKQHSDFCALNPRMTRFSEEACAVLT  
SPTFEACHRAVSPYLRNCRYDVCSCSDGRECLCGALASYAAACAGRGVAVAWREPG  
RCELNCPKGQVYLQCGTPCNLTCRSLSPDEECNEACLEGCFPPGLYMDERGDVCPK  
AQPCPYDGEIFQPEDIFSDHHTMCYCEDGFMHCTMSGVPGSLLPDAVLSSPLSHRSKR  
SLSCRPPMVKLVCPADNLRAEGLECTKTCQNYDLECMSMGCVSGCLCPPGMVRHENR  
CVALERCPCFHQGKEYAPGETVKIGCNTCVCRRDKWNCTDHVCDATCSTIGMAHYLTF  
DGLKYLFPGECQYVLVQDYCGSNPGTFRILVGNKGCSHPSVKCKKRVTLVEGGEIELF  
DGEVNVKRPMKDETHFEVVESGRYIILLGKALSVVWDRHLSISVVLKQTYQEKVCGLC  
GNFDGIQNNDLTSSNLQVEEDPVDFGNSWKVSSQCADTRKVPLDSSPATCHNNIMKQT  
MVDSSCRILTSDVFQDCNKLVDPEPYLDVCIYDTCSCESIGDCACFCDTIAAYAHVCAQ  
HGKVVTWRTATLCPQSCEERNLRENGYECEWRYNSCAPACQVTCQHPEPLACPVQCVE  
GCHAHCPPGKILDELLQTCVDPEDCPVCEVAGRRFASGKKVTLNPSDPEHCQICHCDVV  
NLTCEACQEPGGLVVPPTDAPVSPTTLYVEDISEPPLHDFYCSRLLDLVFLLDGSSRLSEA  
EFEVLKAFVVDMMERLRISQKWVAVVEYHDGSHAYIGLKDRKRPELRRIASQVKY  
AGSQVASTSEVLKYTLFQIFSKIDRPEASRITLLLMAEQEPQRMSRNFVRYVQGLKKKKV  
IVIPVIGIPHANLKQIRLIEKQAPENKAFVLSSVDELEQQRDEIVSYLCDLAPEAPPPTLPP  
DMAQVTVGPGLLVSTLGPKRNSMVLDAFVLEGSKDIGEDFNRSKEFMEEVIQRMD  
VGQDSIHVTVLQYSYMTVEYPFSEAQSKGDILQVREIRYQGGNRTNTGLALRYLSDH  
SFLVSQGDREQAPNLVYMVTGNPASDEIKRLPGDIQVVPVIGVGPANVQELERIGWPNA  
PILIQDFETLPREAPDLVLQRCCSGEGLQIPTLSPAPDCSQPLDVILLDDGSSSFPASYFDE  
MKSFAKAFISKANIGPRLTQVSVLQYGSITTIDVPWNVPEKAHLLSLVDVMQREGGPS  
QIGDALGFAVRYLTSEMHGARGASKAVVILVTDVSVDSVDAAADAARSNRVTVPFIGI  
GDRYDAAQLRILAGPAGDSNVVVKLQRIEDLPTMVTLGNSFLHKLCSGFVVICMDEEDGNE  
KRPQDVWTLDPDQCHTVTCQPDGQTLKSHRVNCDRGLRPSQSPVKVEETCGCRW  
TCPCVCTGSSTRHIVTFDQNFKLTGSCSYVLFQNKEDLEVILHNGACSPGARQGCМК  
SIEVKHSALSVELHSDMEVTVNGRLVSVPYVGGNMEVNVYGAIMHEVRFNHLGHIFTF  
TPQNEFQLQLSPKTFASKTYGLCGICDENGANDFMLRDGTVTTDWKTLVQEWTVQRP  
GQTCQPILEEQCLVPDSSHCQVLLLPLFAECKVLAPATFYAICQQDSCHQEQVCEVIAS  
YAHLCRTNGVCVDWRTPDFCAMSPPSLVYNHCEHGCPRHCDGNVSSCGDHPSEGCF

PPDKVMLEGSCVPEEACTQCIGEDGVQHQFLEAWVPDHQPCQICTCLSGRKVNCTTQPC  
PTAKAPTCGLCEVARLRQNADQCCPEYECVCDPVSCDLPPVPHCERGLQPTLTNPGECR  
PNFTCACRKEECKRVSPSPCPHRLPTLRKTQCCDEYECACNCVNSTVSCPLGYLASTAT  
NDCGCTTTTCLPDKVCVHRSTIYPVGQFWEEGCDVCTCTDMEDAVMGLRVAQCSQKP  
CEDSCRSGFYVVLHEGECGRCLPSACEVVTGSPRGDSQSSWKS SVGSQWASPENPCLIN  
ECVRVKEEVFIQQRNVSCPQLEVPVCPSPGFQLSCKTSACCPSCRCERMEACMLNGTVIGP  
GKTVMIDVCTTTCRCMVQVGVISGFKLECRKTTCNPCPLGYKEENNTGECCGRCLPTACT  
IQLRGGQIMTLKRDETLQDGDTHFKVNERGEYFWEKRVGTGCPPFDEHKCLAEGGKI  
MKIPGTCCDTCEEPECNDITARLQYVKVGSCKSEVEVDIHYCQGKCASKAMYSIDINDV  
QDQCSCCSPTRTEPMQVALHCTNGSVVYHEVLNAMECKCSPRKCSK

An101-VWF

MIPARFARVLLALALTLPGTLCAEGTRGRSSMARCSLFGSDFINTFDGSMYSFAGYCSYL  
LAGDCQKRSFSIIGDFQNGKRVLSVYLGEFFDIHLFVNGTVTQGDQRVSMPLYASKGLY  
LETEAGYYKLSGEAYGFVARIDGSGNFQVLLSDRYFNKTCGLCGNFNIFAEDDFMTQEG  
TLTSDPYDFANSWALSSGEQWCERASPPSSSCNISSGEMQKGLWEQCQLLKSTSVFARC  
HPLVDPEPFVALCEKTLCECAEGLECVCPAFLEYARTCAQEGMVLYGWTDHSAACSPVC  
PAGMEYKQCVSPCTRTCQSLHINEVCQERCVDGCSCEGQLLDEGLCVESTPCPMHSG  
KRYPPGASLSRDCNTCICRNSQWICSNEECPGECLVTGQSHFKSFDNRYFTFSGICQYLL  
ARDCQDHSFSIVIETVQCADDPDAVCTRSVTVRLPGLHNSLVKLKHGGGVAMDGQDVQ  
LPLLKGDRLRIQHTVTASVRLSYGEDLQMDWDGRGRLLVKLSVYAGKTCGLCGNYNG  
NQGDDFLTPSGLAEPVEDFGNAWKLHGDCQDLQKQHS DPCALNPRMTRFSEEACA  
VLTSPTEACHRAVSPLPYLRNCRYDVCSCSDGRECLCGALASYAAACAGRGVRIAWREP  
GRCELNCPKGQVYLQCGTPCNLTCRSLSYPDEECNEACLEGCFCPPGLYMDERGDV  
KAQCPCYYDGEIFQPEDIFSDHHTMCYCEDGFMHCTMSGVPGSLLPDAVLSSPLSHRSK  
RSLSCRPPMVKLVCPADNPRAEGLECAKTCQNYDLECM SMGCVSGCLCPPGMVRHEN  
RCVALERCPCFHQKEYAPGETVKIDCNTCVCRDRKWNCTDHVCDATCSTIGMAHYLT  
FDGLKYMFPGECQYVLVQDYCGSNPGTFRILVGNEGCSHPSVKCKKRVTLVEGGEIEL  
FDGEVNVKRP MKDETHFEVVESGRYIILLGKALS VVWDRHLSISVVLKQTYQEVCGL  
CGNFDGIQNNDLTSSNLQVEEDPVDFGNSWKVSSQCADTRKVPLDSSPATCHNNIMKQ  
TMVDSSCRILTS DIFQDCNKLVDPEPYLDVCIYDTCSCESIGDCACFCDTIAAYAHVCAQ  
HGKVVTWRTATLCPQSCEERNLRENGYECEWRYNSCAPACRVTCQHPEPLACPVQCVE  
GCHAHCPPGKILDELLQTCVNPEDCPVCEVAGRRLASGKKVTLNPSDPEHCQICHCDGV  
NLTCEACQEPGGLVVPPTDAPVSPTTPYVEDISEPPLHDFYCSRLLDLVFLLDGSSRLSEA  
EFEVLKAFVVDMMERLRISQKWVRVA VVEYHDGSHAYIGLKDRKRPSELRRIASQVKY  
AGSQVASTSEVLKYTLFQIFGKIDRPEASRIALLMASQEPQRMSRNFVRYVQGLKKKK  
VIVIPVGIGPHANLKQIRLIEKQAPENKAFVLSGVDELEQQRDEIVSYLCDLAPEAPPPTM  
PPHMAQVTVGPGLLGVSPLGPKRNSMVLDVAFVLEGS DKIGEADFNRSKEFMEEVIQR  
MDVGQDGIHVTVLQYSYMTVEYPFSEAQSKGDILQRVREIRYQGGNRTNTGLALQYL  
SEHSFLVSQGDREQAPNLVYMTGNPASDEIKRLPGDIQVVPVIGVPHANVQELERIGW  
PNAPILIQDFETLPREAPDLVLQRCCSGEGLQIPTLSPAPDCSQPLDVLLLLDGSSSSPASY

FDEMKSF A KAFISKANIGPHLTQVSVLQYGSITTIDVPWNVAQEKAHLLSLVDVMQREG  
GPSQIGDALGFAVRYLTSEVHGARPGASKAVVILVTDVSVDSVDAADAARSNRVTVF  
PIGIGDRYDAAQLRILAGPAADSNVVKLQRIEDLPTMVTLGNSFLHKLCSGFVRCMDED  
GNEKRPGDVWTLPDQCHTVTCQPDGQTLLKSHRVNCDRGPRPSCPNSQSPVKVEETCG  
CRWTCPCVCTGSSTRHIVTFDQNFKLTGSCSYVLFQNKEDLEVILHNGACSPGARQG  
CMKSIEVKHSALSVELHSDMEVTVNGRLVSVPYVGGNMEVNIYGAIMHEVRFNHLGHI  
FTFTPQNNEFQLQLSPKTFASKTYGLCGICDENGANDFMLRDGTVTTDWTLVQEWTV  
QQPGQTCQPILEEQCPVSDSSHCQVLLSALFAECHKVLAPATFYAICQQDSCHREQVCEV  
IASY A HLCRTSGVCVDWRTPDFCAMSPPSLVYNHCERGCPRHCDGNVSSCGDHPSEG  
CFCPPNQVMLEGSCVPEEACTQCIGEDGVRHQFLEAWVPDHPQCQICTCLSGRKVNCTT  
QPCPTAKAPTCLCEVARLRQNADQCCPEYECVCDPVSCDLPPVPHCEGGLQPTLTNPG  
ECRPNFTCACRKEECKRVSPSPCPPHRLPTLRKTQCCDEYECACNCVNSTVSCPLGYLAS  
TATNDCGCTTTTCLPDKVCVHRGTIYPVGQFWEEGCDVCTCTDMEDAVMGLRVAQCS  
QKPCEDSCRSQFTYVLHEGECCGRCLPSACEVVTGSPRGDSQSSWKS V GSRWASPENPC  
LINECVRVKEEVFVQQRNVSCPQLEVPVCPSPGFQLSCKTSECCPSCRCEPVEACMLNGTII  
GPGKSVMDVCTTCRCIVQAGAISGFKLECRKTTCKPCPLGYKEENNPGECCGRCLPTA  
CTIQLRGGQIMTLKRDETLQDGCDSHFCKVNERGEYIWEKRVGTGCPPFDEHKCLAEGGK  
IMKIPGTCCDTCEEPECKDITARLQYVKVGSCKSEVEVDIHYCQGKCASKAMYSIDIEDV  
QDQCSCCSPTRTEPMRVPLHCTNGSVVYHEVLNAMQCKCSPRKCSK

An84-VWF

MIPARLARVLLALALTLPGTLCTEGTRGRSSMARCSLFGDDFINTFDESMYSFAGDCSYL  
LAGDCQKHSFSILGDFQNGKRVSLSVYLGEFFDIHLFVNGTVMQGDQRV SMPYASKGL  
YLETEAGYYKLSSEAYGFVARIDGSGNFQVLLSDRYFNKTCGLCGNFNIFAEDDFRTQE  
GTLTSDPYDFANSWALSSGEQRCKRASPPSSPCNISSGEMQKGLWEQCQLLKSASVFAR  
CHPLVDPEPFVALCEKTLCTCAQGPECACPALLEYARACAQEGMVLYGWT D HSACRPA  
CPAGMEYKECVSPCTRTCQSLHINEVCQEQCVDGCSCPEGQLLDEGRCVESAECSVHS  
GKRYPPGASLSQDCNTCICRNSLWICSNEECPGECLVTGQSHFKSFDNRYFTFSGICQYL  
LARDCQDHSFSIVIETVQCADDPDAVCTRSVTVRLPALHNSLVKLBHGGGVAMDGQDV  
QVPLLQGD LRIQHTVMASVRLSYGEDLQMDWDGRGRLLVKLSPVYAGKTCGLCGNYN  
GNKGDDFLTPAGLVEPLVEDFGNAWKLHGDCQDLQKQHSDPCSLNPRLTRFAEEACAL  
LTSSKFEACHHAVSPLPYLQNCRYDVCSCSDGRDCLCSAVASYAAACARRGVHIAWRE  
PGFCALSCPQGQVYLQCGTPCNLTCRSLSPDEECNEVCLEGCFPPGLYLDERGDCVP  
KAQCPCYDGEIFQPEDIFSDHHTMCYCEDGFMHCTTSGAPGSLLPDTVLSSPLSHRSKR  
SLSCRPPMVKLVCPADNPRAEGLECAKTCQNYDLECM SMGCVSGCLCPPGMVRHENR  
CVALERCPCFHQGREYAPGETVKIDCNTCVCRDRKWNCTDHVCDATCSAIGMAHYLTF  
DGLKYMFPGECCQYVLVQDYCGSNPGTFRILVGNEGCGYPSVKCKKRVTILVEGGEIELF  
DGEVNVKRP MKDETHFEVVESGRYVILLGKALSVVWDRHLGISVVLKQTYQE QVCGL  
CGNFDGIQNNDFTSSNLQVEEDPVD FGN SWKVSSQCADTRKVPLDSSPATCHNNIMKQT  
MVDSSCRILTS DIFQDCNKLVDPEPYLDVCIYDTCSCE SIGDCACFCDTIAAYAHVCAQH  
GKVVTWRTATLCPQSCEERNLRENGYECEWRYNSCAPACPVTCQHPEPLACPVQCVEG

CHAHCPPGKILDELLQTCVDPEDCPVCEVAGRRLAPGKKVTLNPSDPKHCQICHCDGVN  
LTCEACQEPGGLVVPPTTEAPVSPTTPYVEDTPEPPLHDFYCSKLLDLVFLLDGSSKLSEAE  
FEVLKAFVVGMMERLHISQKRIRVAVVEYHDGSHAYIELKDRKRPELRRIASQVKYAG  
SQVASTSEVLKYTLFQIFGKIDRPEASRIALLLTASQEPARMARNLVRYVQGLKKKKVIVI  
PVGIGPHANLKQIRLIEKQAPENKAFVLSGVDELEQRRDEIINYLCDLAPEAPAPTQPPQM  
AQVTVGPGLLGVSPPGPKRNSMVLVDFVLEGSCKIGEANFNRSKEFMEEVIQRMVVG  
QDGIHVTVLQYSYMVTVEYTFSEAQSKGDVLRVREIRYQGGNRTNTGLALQYLSEHS  
FSASQGDREQAPNLVYMVTGNPASDEIKRLPGDIQVVPVIGVGHANVQELERIGWPNAPI  
LIQDFETLPREAPDLVLRCCSGEGLQIPTLSPAPDCSQPLDVVLLLDGSSSSPASYFDEM  
KSAKAFISKANIGPHLTQVSVLQYGSITTIDVPWNVAQEKAHLLSLVDLMQREGGSPQI  
GDALGFAVRYITSEVHGARGASKAVVILVTDVSTDSVDAADAARSNRVTVFPIGIGD  
RYDEAQLRILAGPEASSNVKLQRIEDLPTMVTLGNLFLHKLCSGFVRCMDEEDGNEKR  
PGDVWTLPDQCHVTCLPDGQTLKSHRVNCDRGRPRSPNSQSPIRVEETCGCRWTCP  
CVCMGSSTRHIVTFDQGNFKLTGSCSYVLFQNKQDLEVLHNGACSPGARQTCMKSIE  
VKHDGLSVELHSDMEVTVNGRLVSVPYVGGNMEVNIYGAIMHEVRFNHLGHIFTFTPQ  
NNEFQLQLSPKTFASKMYGLCGICDENANDFMLRDGTVTTDWTLIQEWTVQQPGQT  
CQVPPEEQCPVSDSSHCQVLLSALFAECHKVLAPATFYAICQQDSCHREQVCEVIASIA  
HLCRTNGVCVDWRTTDFCAMSCPPSLVYNHCERGCPRHCDGNTSSCGDHPSEGCFPCP  
HQVMLEGSCVPEEACTQCVGEDGVRHQFLETWVPDHQPCQICTCLSGRKNCTSQPCP  
TARAPTCGPCEVARLRQNADQCCPEYECVCDLVSCDLPPVPHCEGGLQPTLTNPGECRP  
NFTCACRKEECCRRESPPSCPPHRTPTLRKTQCCDEYECACNCVNSTVSCPLGYLASATTN  
DCGCTTTTCLPDKVCVHRGTIYPVGQFWEEGCDVCTCTDMEDAVMGLRVAQCSQKPC  
EDSCRPGFTYVLHEGECGRCLPSACEVVTGSPRGDSQSYWKSXVGSWASPENPCLINE  
CVRVKEEVFVQQRVNSCPQLDVPTCPTGFQLSCKTSECCPSCRCEPVEACMLNGTIIGPG  
KSMIDVCTTCHCTVQVGAISGFKLECRKTTCEACPLGYKKEKNQGECCGRCLPTACTI  
QLRGGQIMTLKRDETLQDGCDSHFCKVNERGEYIWEKRVTGCPPFDEHKCLAEGGKIM  
KIPGTCCDTCEEPECKDITARLQYVKVGDCKSEEEVDIHYCQGKASKAVYSIDTEDVQ  
DQCCSPTRTEPMRVPLHCTNGSVVYHEVLNAMQCKCSPRKCSK

An63-VWF

MIPARLARVLLALALTLPGLTCTEGTRGRSSMARCSLFGDDFINTFDESMYSFAGDCSYL  
LAGDCQKHSFSILGDFQNGKRVSLSVYLGEFFDIHLFVNGTVMQGDQSVSMPLYASKGL  
YLETEAGYYKLSSEAYGFVARIDGSGNFQVLLSDRYFNKTCGLCGNFNRFAEDDFRTQE  
GTLTSDPYDFANSWALSSGEQRCKRASPPSSPCNISSGEMQKGLWEQCQLLKSASVAFAR  
CHPLVDPEPFVALCEKTLCTCAQGPDCPCSALLEYARACAQQGMVLYGWTDHSTCRPA  
CPAGMEYKECVSPCTRTCQSLHINEVCQEQCVDGCSCPEGQLLDEGRCVESAECSCVHS  
GKRYPPGSSLSQDCNTCICRNSLWICSNEECPGECLVTGQSHFKSFDNRYFTFSGICQYLL  
ARDCQDHSFSIVIVETVQCADDPAVCTRSVTVRLPSLHNSLVKLNHGGGVAMDGQDVQ  
IPLLQGDRLRIQHTVMASVRLSYGEDLQMDWDGRGRLLVKLSVYAGKTCGLCGNYNG  
NKGDDFLTPSGLVEPLVEDFGNSWKLHGDCQDLQKQSDPCNLNPRLTRFAEEACALL  
TSSKFEACHHAVSPQPYLQNCYDVCSCSDGRDCLCSAVASYASACARKGVHIAWREP



GFCALSCPQGQVYLQCGTPCNLTCRSLSYPDEECNEVCLEGCF CPPGLYLDERGDCVPK  
AQPCYYDGEIFQPEDIFSDHHTMCYCEDGFMHCTTSGLP GSLLPDVVLSSPLSHRSKRS  
LSCRPPMVKLVCPADNPRAEGLECAKTCQNYDLECMSTGCVSGCLCPPGMVRHENRCV  
ALERCPCFHQKEYAPGETVKIDCNTCVCRDRKWNCTDNVCDATCSVIGMAHYLTFDG  
LKYMFPGECQYVLVQDYCGSNPGTFRILVGNEGCGYPSVKCKKRV TILVEGGEIELFDG  
EVNVKRPMKDETHFEVVESGRYVILLGKALSVVWDHHLGISVVLKQTYQE QVCGLCG  
NFDGIQNNDF TSSNLQVEEDPVDFGNSWKVNPQCADTRKVPLDSSPATCHNNIMKQTM  
VDSSCRILTSDIFQDCNKLVDPEPYLDVCIYDTCSCE SIGDCACFCDTIAAYAHVCAQHG  
KVVTWRTATLCPQSCEERNLRENGYECEWRYNSCAPACPVTCQHPEPLACPVQCVEGC  
HAHCPPGKILDELLQTCIDPEDCPVCEVAGRRLPPGKKVTLNPSDPKHCQICHCDGVNLT  
CEACQEPGGLVLPPTTEAPVSP TTPYVEDTPEPPLHDFYCSKLLDLAFLLDGSSKLSEAEFE  
VLKAFVVGMMERLHISQKRIRVAVVEYHDGSHSYIELKDRKRPELRRIASQVKYAGSQ  
VASTSEVLKYTLFQIFGKADRPEASRIALLTASEEPPRMARNLVRYVQGLKKKKVIVIP  
VGIGPHASLKQIRLIEKQAPENKAFVLSGVDELEQRREIINYLCDLAPEAPAPTQPPQMA  
QVTVGPGLLGVSPPGPTRSSMVL DVVFLVLEGS DKIGEANFNRSKEFMEEVIQRMDVGD  
SIHITVLQYSYMTVEYTFSEAQSKGDILQRVREIRYQGGNRTNTGLALQYLSEHSFSTS  
QGDREQAPNLVYMVTGNPASDEIKRLPGDIQVVP IGVGPHANVQELERISWPNAPILIQD  
FETLPREAPDLVLQRCCSGEGLRIPTLSPAPDCSQPLDVVLLLDGSSSVPASYFEEMKSFA  
KAFISKANIGPHLTQVSVLQYGSITTIDVPWNVAQEKAHLLSLVDLMQREGGPSQIGDAL  
GFAVRYITSEVHGARGASKAVVILVTDVSMDSVDAADAARSNRVTVP IGIQDRYDE  
SQLRILAGPEASSNVVKLQRIEDLPTMVTLDNSFLHKLCSGFVRVCMDEDGNEKRP GDV  
WTLPDQCHT V T CLPDGQTLLKSHRVNCDRGP KPSPNSQSPIRVEETCGCRWTCPCVCM  
GSSTRHIVTFDGQNFKLTGSCSYVLFQNK EQDLEVILHNGACSPGARQTCMKSIEVKHD  
GLSVELHSDMEVTVNGRLVSVPYVGGNMEVNIYGAIMHEIRFNHLGHIFTFTPQNNEFQ  
LQLSPKTFASKMYGLCGICDENGANDFMLRDGTVT TDQKTLIQEWTVQQPGQTCQVP  
EEQCPVSSSSHCQVLLSALFAECHKVLAPATFYAICQQDSCHREQVCEVIASIAHLCRTN  
GVCVDWRTTDFCAMSCPPSLVYNHCEHGCPRHCEGNTSSCGDHPSEGCF CPPHQVMLE  
GSCVPEEACTQCISEDGVRHQFLETWVPD HQPCQICMCLSGRKNCTS QPCPTARAPTC  
GPCEVARLHQNPDQCCPEYECVCDLVSCDLPPVPHCEGGLQPTLTNPGE CRPNFTCACR  
KEECRRESPPSCPPHRTPTLRKTQCCDEYECACNCVNSTVSCPLGYLASAVTND CGCTTT  
TCLPDKVCVHRGTIYPVGQFWEEGCDVCTCTDMEDAVMGLRVAQCSQKPCEDSCRS G  
FTYVLHEGECCGRCLPSACEVVTGSPRGDSQSYWKS VSGSHWASPENPCLINECVRVKEE  
VFVQQRNVSCPQLDVPTCPVGFQLSCKTSECCPTCHCEPVEACMLNGTIIGPGKSLMIDV  
CTTCHCTVQVGVISGFKLECRKTTCEACPLGYKEEKTQGECCGRCLPTACTIQLRGGQI  
MTLKRDETLQDGCDSHFCKVNERGEYIWEKRV TGCPPFDEHKCLAEGGKIMKIPGTCC  
DTCEEPECKDITARLQYVKVGDCCKSEEEVDIHYCQGKCASKAVYSIDTEDVQDQCSCCS  
PTRTEPMQVPLHCTNGSVVYHEVLNAMQCKCSPRKCSK

An70-VWF

MIPARLARVLLALALTLPGALCGEGTLGRSSMARCSLFGDDFINTFDESMYSFAGSCSYL  
LAGDCQKHSFSLIGDFQDGKRVSLSVYLGEFFDIHLFVNGTVLQGDQSVSMPYASKGLY

LETEAGYYKLSSEAYGFVARIDGSGNFQVLLSDRYFNKTCGLCGNFNIFAEDDFRTQEG  
TLTSDPYDFANSWALSSGEQRCQRASPPSSSCNVSSSEMOKGLWEQCQLLKSASVFARCH  
PLVDPEPFVALCEKMLCTCAQGLQCPCPVLLIYARACAQQGMVLYGWTDHSA CRPAC  
PAGMEYKECVSPCTRTCQSLHINEVCQEQCVDGCSCEGQLLDEGRCVESAECSCVHSG  
KRYPPGASLSRDCNTCICRNSLWVCSNEECPGECLVTGQSHFKSFDNRHFTFSGVCQYL  
LARDCQDHSFSVIETVQCADDPDAVCTRSVTVRLPSPHNSLVKCLKHGGGVAMDGQDV  
QIPLLQGDRLRIQHTVMASVHLSYGEDLQIDWDGRGRLLVKLSPVYAGRTCGLCGNYNG  
NRGDDFLTPAGLVEPLVEHFGNAWKLRGDCEDLQKQPSDPCSLNPRLTRFAEEACAILT  
SPKFEACHSAVGPLPYLQNCRYDVCSCSDGRDCLCDAVANYAAACARRGVHIAWREP  
GFCALSCPQGQVYLQCGTPCNLTCRSLSYPDEECNEVCLEGCFCPPGLYLDES GDCVPK  
AQPCYYDGEIFQPEDIFSDHHTMCYCEDGFMHCSTSGAPGSLLPDTVLSSPLSHRSKRS  
LSCRPPMVKLVCPADNPRAEGLECAKTCQNYDLECSTGCVSGCLCPPGMVRHENRCV  
ALERCPCFHQGREYAPGETVKIDCNTCVCRDRKWNCTDHVCDASCSALGLAHYLTDFG  
LKYLFPGECQYVLVQDYCGSNPGTFRILVGNEGCGYPSLKCRKRVTILVEGGEIELFDGE  
VSVKRPMKDETHFEVVESGRYITVLLGKALS VVWDRHLGISVFLKQTYQEVCGLCGN  
FDGVQNNDLTSSSLQVEEDPVDFGNSWKVSPQCADTRKVPLDSSPATCHNNVMKQTM  
VDSSCRILTSDFQDCNKLVDPEPYLDVCIYDTCSCESIGDCACFCDTIAAYAHVCAQHG  
KVVTWRTATLCPQNCERNLRENGYECEWRYNSCAPACPVTCQHPEPLACPVCVEGC  
HAHCPPGKILDELLQTCVDPEDCPVCEVAGRRLAPGKKITLNPGDPEHCQICHCDGVNL  
TCEACREPGGLEVPPTTEGPVSPTTPYVEDTPEPLHDFFCSKLLDLVFLLDGSSKLSEADF  
EVLKAFVVGMMERLHISQKRIRVAVVEYHDGSHAYIALRDRKRPSSELRIASQVKYAGS  
EVASTSEVLKYTLFQIFGKIDRPEASRVALLTASQEPRLARNLVRYVQGLKKKKVTVI  
PVGIGPHASLKQIRLIEKQAPENKAFVLSGVDELEQRRDEIISYLCDLAPEVPAPTQRPLV  
AQVTVAPELLGVSTLGPKRSSMVLDVVFVLEGS DKVGEANFNRSSTEFVEEVIRRM DVG  
RDSVHVTVLQYSYVVTVEYSFREAQSKGDVLRVREIRYQGGNRTNTGLALQYLSEHS  
FSASQGDREQAPNLVYMVTGNPASDEIRRM PGDIQVVPIGVGPHVDVQELERIGWPNAP  
IFIQDFETLPREAPDLVLQRCCSGEGPHLPTLSPAPDCSQPLDVVLLLDGSSSSPASYFDE  
MKSF AKA FISKANIGPQLTQVSVLQYGSITTIDVPWNVAQEKAHLLSLVDLMQREGGPS  
QIGDALGFAVRYVTSEVHGARGASKAVVILVTDSTSDSVDA AAAAAARSNRVAVFPIGI  
GDRYDEAQLRTL A GP GASSNVKLQRIEDLPTMVTLGNSFLHKLCSGFVRVCVDEDGN  
ERRPGDVWTL PDQCHT VTCLPDGQTLLKSHRVNCDQGPRPSCPN SQSPIRVEETCGCRW  
TCPCVCTGSSTRHIVTFDGQNFKLTGSCSYVLFHNKEQDLEVILHNGACSAGARQACMK  
SIEVKHNGLSVELHSDMEVVVNGRLVSVPYVGGNMEVSIYGTIMYEVRFNHLGHIFTFT  
PQNNEFQLQLSPKTFASKMYGLCGICDENGANDFMLRDGTVTTD WKT LVQE WTVQQP  
GQTCQPVPEEQCPVSGGSHCQVLLSALFAECKVLAPATFHAICQQDSCHQE QVCEAIA  
SYAHL CRTKGV CVDWRTPDFCAVSCPPSLVYNHCEHGCPRHCEGNSSSCGDHPSEGCF  
CPPHQVMLEGSCVP EEA CTQCVSDDGIRHQFLETWVPDHQPCQICTCLSGRKVNCTSQP  
CPTARAPACGPCEVARLRQNAQQCCPEYECVCDLVSCDLPPVPHCEGGLQPTLTNPGE C  
RPNFTCACRKEECPRGPPSPPHRTPALRKTQCCDEYECACNCVNSTVSCPLGYLASTV  
TND CGCTTTTCLPDKVCVHRGTIYPVGQFWEEGCDVCTCTDLEDAVMGLRVAQCSQKP  
CEDSCRPGFTYVLHEGECCGRCLPSACEVVTGSPRGDSQSYWKS VGS HWASPENPCLIN  
ECVRVKEEVFVQQRNVSCPQLDVPTCPVGFQLSCKTSECCPTCRCEPVQACVLNGTIIGP  
GKSLMIDVCTTCRCTVQEGVVS GFKLECRKTTCEACPLGYKEEKMQGECCGRCLPTAC

TIQLRGGQIMTLKRDETLQDGCDSHFRCRVNERGEYIWEKRVMGCPPFDEHKCLAEGGKI  
MKIPGTCCDTCEEPECKDITARLQYVKVGDCKSEEEVDIHYCQGKCTSKAVYSIDTEDV  
QDQCSCCSPTRTEPMQVPLRCTNGSIIHHEVLNAMQCKCSPRKCSK

An88-VWF

MNPARFEIWLLALALTWPGTLCTEKTRDRPSMARCSLFGDDFINTFDETMYSFAGGCSY  
LLAGDCQKRSFSILGNFQDGKRVSLSVYLGEFFDIHLFANGTVMQGDQSSIMPYASKGL  
YLETEAGYYKLSSEAYGFVARIDGDGNFQVLMSEDRHFNKTCLGCGDFNIFAEDDFRTQE  
GTLTSDPYDFANSWALSSGEQRCKRASPPSSHCNSSSGDMQKAMWEQCQLLKSASVFA  
RCHPLVDPEPFVALCEKTLCTCTTGPECACPALLEYARTCAQEGMVLYGWTDHSAACRP  
ACPAGMEYKECVSPCTRTCQSLPINEVCQQQCVDGCGCPEGELLEDRCVQSSECSVH  
AGKRYPPGTSLSQDCNTCICRNSLWICSNEECPGELVTGQSHFKSFDNRYFTFSGICQY  
LLARDCQDHSFSIVIETMQCADDPDAVCTRSVTVRLSALHNSLVKLVKHHGGVAIDGQD  
VQIPFLQGDRLRIQHTVMASVRLSYGEDLQMDWDGRGRLLVKLSPVYSGKTCGLCGNYN  
GNKGDDFLTPAGLVEPLVDFGNWKLQGDPCDLHRQHSDPCSLNPRLTRFAEEACAL  
LTSSKFEACHHAVSPLPYLQNCRYDVCSCSDGRDCLCSAVANYAAACARKGVHIGWRE  
PDFCALGCPQGQVYLQCGNSCNLTCRSLSYPDEECNEVCLEGCFPPGLYQDERGDCVP  
KAQCPCYYDGELFQPADIFSDHHTMCYCEDGFMHCTTSGTPGSLLPDIIVLSSPLSHRSKR  
SLSCRPPMVKLVCPADNPRAQGLECAKTCQNYDLECMVSLGCVSGCLCPPGMVRHENKC  
VALERCPCFHQGEYAPGDTVKIGCNTCVCRDRRWNTNHVCDATCSAIGMAHYLTF  
DGLKYLFPGECQYVLVQDYCGSNPGTFRILVGNEGCSYPSVKCKKRVTILVEGGEIELFD  
GEVNVKRPLKDESHFEVVEVSGRYVILLGQALSVDHHLSSISVVLKHTYQEVCGLC  
GNFDGIQNNDFTSSSLQVEEDPVDFGNSWKVSSQCADTRKLSLDVSPATCHNNIMKQT  
MVDSSCRILTSDIFQGCNRLVDPEPYLDICIYDTCSCESIGDCACFCDTIAAYAHVCAQH  
QVVAWRTPTLCPQSCEERNVRENGYECEWRYNSCAPACPVTCQHPEPLACPVQCVEGC  
HAHCPPGRILDELLQTCVDPQDCPVCEVAGRRLAPGKKITLSPDDPAHCQNCCHCDGVNL  
TCEACQEPGGLVVPPTDAPVSSTTPYVEDTPEPPLHNFYCSKLLDLVFLLDGSSRLSEAEF  
EVLKAFVVGMMERLHISQKRIRVAVVEYHDGSHAYIELKARKRPSSELRRIASQVKYAGS  
QVASTSEVLKYTLFQIFGKIDRPEASRIVLLLTASQEPPRMARNLVRYVQGLKKKKVIVIP  
VGIGPHASLKQIRLIEKQAPENKAFLLSGVDELEQRRDEIINYLCDLAPEAPAPTQPPQVA  
QITVSPGILGISSPGPKRKSMLVDVVFVLEGSDEVGEANFNKSKEFLEEVIQRMDVGGQD  
IHISVLQYSYTVTVEYTFNEAQSKEDVLRHVREIRYQGGNRTNTGQALQYLSEHSFSPSQ  
GDREQAPNLVYMVTGNPASDEIKRLPGDIQVVPVIGVPHANAQELERIGWPNAPIFIRDF  
ETLPREAPDLVLQRCCSREGLQLPTLSPTPDCSQPLDVVLLLDGSSSLPESYFDEMKSFAK  
AFISKANIGPHLTQVSVLQYGSINTIDVPWNVAQEKAHLLSLVDLMQREGGPSQIGDALA  
FAVRYVTSQIHGARPGASKAVVILIMDTSLDSVDTAADAARSNRVAVFPIGVGDRYDEA  
QLRILAGPGASSNVKLLQQVEDLPTMVTLGNSFFHKLCSGFSGVCVDEEDGNEKRPGDV  
WTLPDQCHTVTCLPNGQTLQSHRVNCDHGPRPSCSNSQSPVRVEETCGCRWTCPCVC  
TGSSTRHIVTFDGQNFKLTGNCSYVLFQNKQDLEVILHNGACSPGARQACMKSIEVKH  
AGLSVELHSDMEMAVNGRLVPAPYVGGNMEVSIYGAIMYEVRFNHLGHILTFTPQNE  
FQLQLSPKTFASKMYGLCGICDENANDFMLRDGTVTDDWKRLIQEWTVQQPGYTCQP

VPEEQCPVSDSSHCQVLLSALFAECHKVLAPATFHAICQQDSCHQERVCEVIASYAHL  
RTNGVCVDWRTTDFCAMSCPPSLVYNHCERGCPRHCDGNTSSCGDHPSEGCFPCQH  
MLEGSCVPEEACTQCVGEDGVRHQFLETWVPDHQPCQICVCLSGRKINCTAQCPTARA  
PTCGPCEVARLKQSANQCCPEYECVCDLVNLCNLPPVPPCEGGLQPTLTNPGE  
ACRKEECKRVSPSCPPHRTPTLRKTQCCDEYECACSCVNSTVSCPLGYLASATTN  
CGCTTTTCLPKVVCVHRGTIYPVGQFWEEGCDTCTCTDMEDTVMGLRVAQCSQK  
PCEDSCQPGFSYVLHEGECCGRCLPSACKVVAGSPRGDSHSSWKS VGSRWAVPEN  
PCLINECVRVEEAVFVQQRNISCPQLAVPTCPTGFQLSCETSECCPSCRCEPVEAC  
LLNGTIIGPGKSVMVDLCTTCRCIVQTGAISRFKLECRKTTCEACPMGYREEKNQ  
GECCGRCLPTACTIQLRGQIMTLKRDETLQDGCDSHFCKVNERGEYIWEKRV  
TGCPPFDEHKCLAEGGKIMKIPGTCCDTCEEPDCKDITAKLQYVKVGDCKSQEE  
VDIHYCQGKCASKAVYSIDIEDVQEQCSCCWPSRTEPMRVPLHCTNGSVVYHE  
VINAMQCRCSPRKCSK

- 1 Doering, C. B. *et al.* Directed engineering of a high-expression chimeric transgene as a strategy for gene therapy of hemophilia A. *Molecular therapy : the journal of the American Society of Gene Therapy* **17**, 1145-1154, doi:10.1038/mt.2009.35 (2009).
- 2 Zakas, P. M. *et al.* Development and characterization of recombinant ovine coagulation factor VIII. *PLoS One* **7**, e49481, doi:10.1371/journal.pone.0049481 (2012).
- 3 Favalaro, E. J. & Mohammed, S. Towards improved diagnosis of von Willebrand disease: comparative evaluations of several automated von Willebrand factor antigen and activity assays. *Thromb Res* **134**, 1292-1300, doi:10.1016/j.thromres.2014.09.024 (2014).
- 4 Ni, Y., Nesrallah, J., Agnew, M., Geske, F. J. & Favalaro, E. J. Establishment and characterization of a new and stable collagen-binding assay for the assessment of von Willebrand factor activity. *Int J Lab Hematol* **35**, 170-176, doi:10.1111/ijlh.12019 (2013).
